# Supplementary material for: Melatonin and Glycine Reduce Uterus Ischemia/Reperfusion Injury in a Rat Model of Warm Ischemia
Source: MDPI journal article supplement (doi:10.3390/ijms22168373), 2021-08-04
Supplement: s1 [file s1]

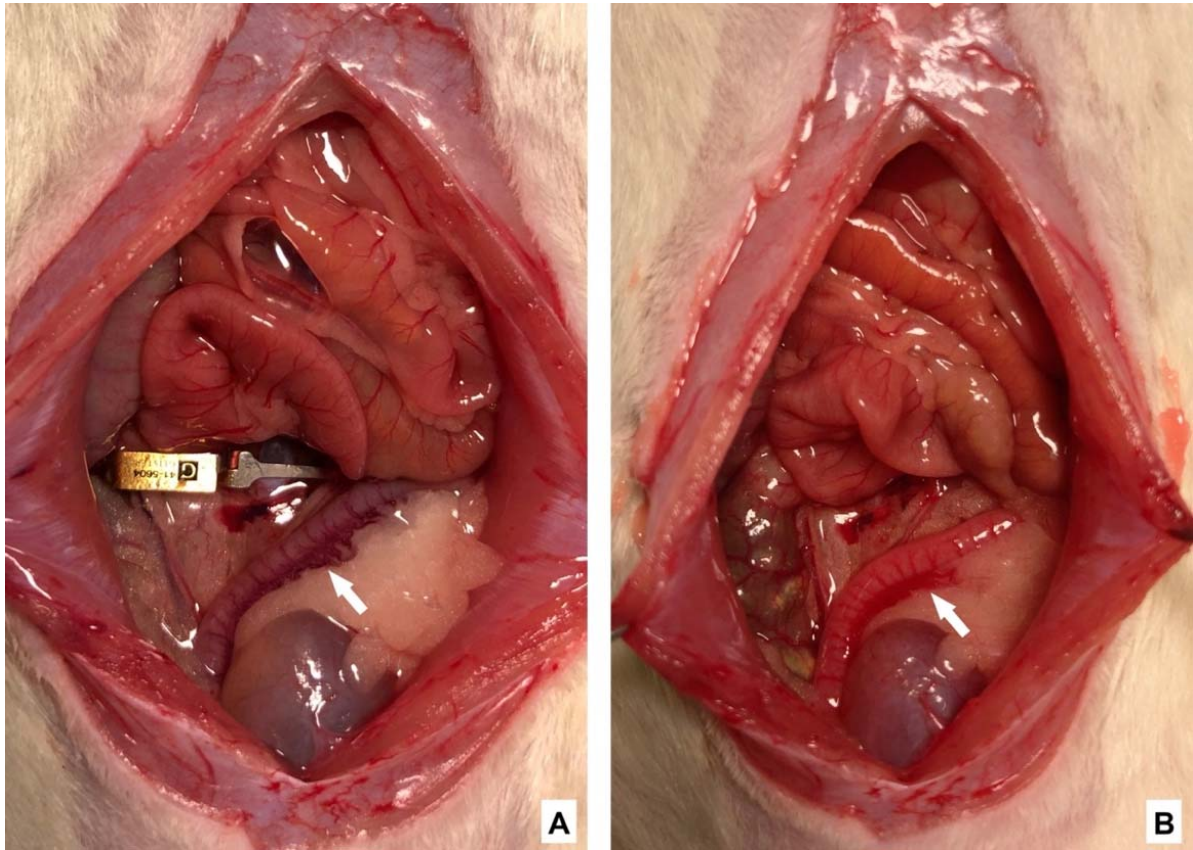

**Figure S1.** Visual changes in uterus during ischemia and reperfusion. A; uterus (white arrow) after 1 h of ischemia. B; uterus (white arrow) after 1 h of ischemia followed by 1 h of reperfusion.
